# Supplementary material
Source: publisher figshare collection journal article supplement (https://gsajournals.figshare.com/articles/dataset/_/6513035)
Supplement: Supplementary file 1 [file 1]

FILE S2. SUPPLEMENTAL TABLES

Supplemental Table S1. Strains of *E. coli* used in this study

| Strain     | Relevant genotype                                                                | Donor   | Recipient | Target gene       | Method | Reference                       |
|------------|----------------------------------------------------------------------------------|---------|-----------|-------------------|--------|---------------------------------|
| NR11257    | <i>dnaE925 mutD5</i>                                                             |         |           |                   |        | (FIJALKOWSKA AND SCHAAPER 1996) |
| FC231      | <i>lexA3</i>                                                                     |         |           |                   |        | (CAIRNS AND FOSTER 1991)        |
| PFM2       | MG1655 <i>rph</i> <sup>+</sup>                                                   |         |           |                   |        | (LEE <i>et al.</i> 2012)        |
| PFM12      | $\Delta proA::Kn^R$                                                              | JW0233  | PFM2      | <i>proA</i>       | A      | This Study                      |
| PFM50      | $\Delta umuDC^{Sc}$                                                              |         |           |                   |        | (FOSTER <i>et al.</i> 2015)     |
| PFM106     | <i>metA::Kn</i>                                                                  | JW3973  | PFM2      | <i>metA</i>       | A      | This Study                      |
| PFM110     | $\Delta proA^{Sc}$                                                               |         | PFM12     | <i>proA::Kn^R</i> | B      | This Study                      |
| PFM111     | <i>metA</i> <sup>+</sup> <i>lexA3</i>                                            | FC231   | PFM106    | <i>lexA</i>       | C      | This Study                      |
| PFM139     | $\Delta proA^{Sc} \Delta mutL^{Sc}$                                              | JW4128  | PFM110    | <i>mutL</i>       | D      | This Study                      |
| PFM132     | $\Delta rnhA::cat-ISceI$                                                         |         | PFM2      | <i>rnhA</i>       | E      | This Study                      |
| PFM149     | <i>dnaE</i> <sup>+</sup> <i>mutD5</i>                                            | NR11257 | PFM132    | <i>dnaQ</i>       | F      | This Study                      |
| PFM150     | <i>dnaE925 mutD5</i>                                                             | NR11257 | PFM132    | <i>dnaQ</i>       | F      | This Study                      |
| PFM163     | <i>dnaE</i> <sup>+</sup> <i>mutD5 proA</i> <sup>+</sup>                          | PFM149  | PFM110    | <i>dnaQ</i>       | C      | This Study                      |
| PFM165     | <i>dnaE</i> <sup>+</sup> <i>mutD5 proA</i> <sup>+</sup> $\Delta mutL^{Sc}$       | PFM149  | PFM139    | <i>dnaQ</i>       | C      | This Study                      |
| PFM174     | $\Delta proA::Kn lexA3$                                                          | JW0233  | PFM111    | <i>proA</i>       | A      | This Study                      |
| PFM397/399 | <i>dnaE</i> <sup>+</sup> <i>mutD5</i> $\Delta mutL^{Sc}$                         | JW4128  | PFM163    | <i>mutL</i>       | D      | This Study                      |
| PFM459     | <i>dnaE925 mutD5</i> $\Delta dinB^{Sc}$                                          | JW0221  | PFM150    | <i>dinB</i>       | G      | This Study                      |
| PFM479     | <i>dnaE</i> <sup>+</sup> <i>mutD5</i> $\Delta dinB^{Sc} proA+$                   | PFM459  | PFM12     | <i>dnaE</i>       | C      | This Study                      |
| PFM492     | $\Delta proA^{Sc} \Delta umuDC^{Sc}$                                             | JW0233  | PFM50     | <i>proA</i>       | D      |                                 |
| PFM515/517 | <i>dnaE</i> <sup>+</sup> <i>mutD5</i> $\Delta dinB^{Sc} proA+ \Delta umuDC^{Sc}$ | PFM459  | PFM492    | <i>dinB dnaQ</i>  | C      | This Study                      |
| PFM686     | <i>dnaE</i> <sup>+</sup> <i>mutD5 proA</i> <sup>+</sup> <i>lexA3</i>             | PFM149  | PFM174    | <i>dnaQ</i>       | C      | This Study                      |

**Methods:** **A.** P1 phage transduction (MILLER 1992) from donor selecting for *Kn*<sup>R</sup>. **B.** FLP recombination to remove the *Kn*<sup>R</sup> element. **C.** P1 phage transduction from donor selecting for prototrophy on minimal glucose medium. **D.** P1 phage transduction from donor selecting for *Kn*<sup>R</sup>, followed by

FLP recombination to remove the  $\text{Kn}^{\text{R}}$  element (DATSENKO AND WANNER 2001); this procedure leaves an in-frame scar sequence, which is indicated above by superscript Sc. **E:** Intermediate in scarless gene deletion using a *cat-I-SceI* cassette (BLANK *et al.* 2011). **F:** P1 phage transduction from donor containing a *cat-I-SceI* cassette, selecting on LB plus anhydrotetracycline and carb, followed by gene replacement of the *cat-I-SceI* site cassette. **G:** Gene replacement by a  $\text{Kn}^{\text{R}}$  cassette, followed by FLP recombination to remove the  $\text{Kn}^{\text{R}}$  element;  $\text{Kn}^{\text{R}}$  element obtained from donor strain by PCR (BABA *et al.* 2006). JW strains are from the Keio collection of gene knockouts (BABA *et al.* 2006).

**Supplemental Table S2. Oligonucleotides used in this study.**

| Relevant genotype        | Name               | Sequence                                                                      | Reference                   |
|--------------------------|--------------------|-------------------------------------------------------------------------------|-----------------------------|
| <i>ΔrnhA::cat-I/SceI</i> | mutD5_rightpWRG100 | 5' -GCTATCGCGGACGCGAGAAAACCTTTAGCGCTGGCTACACCCGCGACCACTTAGACTATATTACCTGTT-3'  |                             |
|                          | mutD5_leftpWRG100  | 5' -CAGGCGGTTGGAGCCACCCGGCAATGTCGTAAAC CACAGGCTTAACTTCCGCCTTACGCCCCGCCCTGC-3' |                             |
| <i>dnaQ</i>              | mutD5 Rv           | 5' -GCAAGTAAGTTACGCGTTG-3'                                                    |                             |
|                          | yafSdnaQ FW        | 5' -CCCGTCCAGGTACAGGCGGA-3'                                                   |                             |
|                          | mutD5 RV2          | 5' -CAACGCGTAACTTACTTGC-3'                                                    |                             |
|                          | yafSdnaQ RV        | 5' -CGCACCAATCTGGTTCATACCGGTGG-3'                                             |                             |
|                          | yafSmutD5 RV       | 5' -CGCACCAATCTGGTTCATACCGGTGA-3'                                             |                             |
|                          | dnaQ FW            | 5' -CGCCAGATCGTTCTCGATAACCGAAAC-3'                                            |                             |
|                          | dnaQmutD5 FW       | 5' -CGCCAGATCGTTCTCGATAACCGAAAT-3'                                            |                             |
| <i>dnaE</i>              | rnhB_6_fw          | 5' -TTCCGTGAACTGCATCAGCA-3'                                                   |                             |
|                          | dnaEFW044          | 5' -CAAACGCGCACTGGGACTTG-3'                                                   |                             |
|                          | dnaEFW494          | 5' -CTATTTTCTCGAGCTGATCC-3'                                                   |                             |
|                          | dnaEFW965          | 5' -GGTTATCAACCAGATGGGCTTC-3'                                                 |                             |
|                          | dnaERV1749         | 5' -GTTTCAGTCTCCAGACGTTTCG-3'                                                 |                             |
|                          | dnaERV2207         | 5' -CATCGCCAGTTCAGCGTTG-3'                                                    |                             |
|                          | dnaERV2962         | 5' -GTGATGACTTTACCACGTTCTG-3'                                                 |                             |
|                          | dnaERV3503         | 5' -GTTCAAAATCAAGGAAATTC-3'                                                   |                             |
| <i>mutL</i>              |                    |                                                                               | (LEE <i>et al.</i> 2012)    |
| <i>umuDC</i>             |                    |                                                                               | (FOSTER <i>et al.</i> 2015) |
| <i>dinB</i>              |                    |                                                                               | (FOSTER <i>et al.</i> 2015) |
| <i>lexA</i>              | lexAF0079          | 5' -GAAAGGTTTACGCGCTGCATGGAT-3'                                               |                             |
|                          | lexAF0121          | 5' -TCAGGAAGGCGTAGCGGTATTGTT-3'                                               |                             |
|                          | lexAF0703          | 5' -TGTTGCAGGAAGAGGAAGAAGGGT-3'                                               |                             |
|                          | lexAR0726          | 5' -ACCTTCTTCTCTTCTCTGCAACA-3'                                                |                             |
|                          | lexAR0949          | 5' -TCAATACGTGCGACAACGACCTGA-3'                                               |                             |
|                          | lexAR1598          | 5' -TGCGCTTAACCAGCGGATTTC AAG-3'                                              |                             |

**Supplemental Table S3: Experimental parameters and base-pair substitution (BPS) results.**

**A. Experimental parameters and numbers of BPS**

| Strain                           | Defect                      | Experi-<br>ments | MA<br>lines | Genera-<br>tions | BPSs   |         |         |         |         |         |         | A:T<br>sites | G:C<br>sites |
|----------------------------------|-----------------------------|------------------|-------------|------------------|--------|---------|---------|---------|---------|---------|---------|--------------|--------------|
|                                  |                             |                  |             |                  | Total  | A:T>G:C | G:C>A:T | A:T>T:A | G:C>T:A | A:T>C:G | G:C>C:G |              |              |
| MA experiments on LB medium      |                             |                  |             |                  |        |         |         |         |         |         |         |              |              |
| *Wild type                       | —                           | 8                | 341         | 2,015,066        | 1933   | 388     | 664     | 162     | 302     | 307     | 110     | 857          | 1,076        |
| *MMR                             | <i>mmr<sup>-</sup></i>      | 10               | 334         | 264,958          | 30,061 | 22,069  | 7,165   | 291     | 165     | 248     | 123     | 22,608       | 7,453        |
| PFM163                           | <i>mutD5</i>                | 1                | 26          | 3,481            | 13,625 | 6,757   | 4,962   | 790     | 652     | 431     | 33      | 7,978        | 5,647        |
| #PFM165/<br>397/399              | <i>mutD5 mutL</i>           | 3                | 75          | 7,012            | 40,686 | 14,185  | 23,985  | 1,638   | 635     | 166     | 77      | 15,989       | 24,697       |
| PFM479                           | <i>mutD5 dinB</i>           | 1                | 34          | 3,748            | 12,505 | 6,101   | 4,904   | 693     | 547     | 239     | 21      | 7,033        | 5,472        |
| <sup>†</sup> PFM515/<br>517      | <i>mutD5 dinB<br/>umuDC</i> | 1                | 30          | 3,037            | 1,2696 | 5,958   | 5,146   | 694     | 571     | 289     | 38      | 6,941        | 5,755        |
| PFM686                           | <i>mutD5 lexA3</i>          | 1                | 43          | 4,006            | 21,594 | 10,042  | 9,347   | 1,055   | 824     | 258     | 68      | 11,355       | 10,239       |
| MA experiments on minimal medium |                             |                  |             |                  |        |         |         |         |         |         |         |              |              |
| PFM163                           | <i>mutD5</i>                | 1                | 41          | 6,720            | 4,595  | 1,710   | 2,023   | 461     | 264     | 121     | 16      | 2,292        | 2,303        |
| PFM165                           | <i>mutD5 mutL</i>           | 1                | 16          | 2,202            | 8,570  | 3,487   | 4,812   | 156     | 79      | 19      | 17      | 3,662        | 4,908        |

**B. Types and consequences of BPS**

| Strain                             | Defect                 | Type of BPS |               | Position of BPS |        | Amino acid changes |                |              |                  |
|------------------------------------|------------------------|-------------|---------------|-----------------|--------|--------------------|----------------|--------------|------------------|
|                                    |                        | Transitions | Transversions | Non-Coding      | Coding | Synonymous         | Non-Synonymous | Conservative | Non-Conservative |
| <u>MA experiments on LB medium</u> |                        |             |               |                 |        |                    |                |              |                  |
| *Wild type                         | —                      | 1,052       | 881           | 448             | 1,368  | 395                | 1,090          | 535          | 555              |
| *MMR                               | <i>mmr<sup>−</sup></i> | 29,234      | 827           | 3,970           | 26,091 | 8,759              | 17,332         | 11,295       | 6,037            |
| PFM163                             | <i>mutD5</i>           | 11,719      | 1,906         | 2,106           | 11,519 | 3,816              | 7,703          | 4,400        | 11,719           |
| #PFM165/<br>397/399                | <i>mutD5 mutL</i>      | 38,170      | 2,516         | 5,109           | 35,577 | 12,654             | 22,923         | 13,786       | 9,137            |

|                                         |                                   |        |       |       |        |       |        |       |       |
|-----------------------------------------|-----------------------------------|--------|-------|-------|--------|-------|--------|-------|-------|
| PFM479                                  | <i>mutD5 dinB</i>                 | 11,005 | 1,500 | 1,921 | 1,0584 | 3,584 | 7,000  | 3,953 | 3,047 |
| <sup>†</sup> PFM515/<br>517             | <i>mutD5 dinB</i><br><i>umuDC</i> | 11,104 | 1,592 | 1,856 | 10,840 | 3,701 | 7139   | 4,051 | 3088  |
| PFM686                                  | <i>mutD5 lexA3</i>                | 19,389 | 2,205 | 3,210 | 18,384 | 6,286 | 12,098 | 7,009 | 5,089 |
| <u>MA experiments on minimal medium</u> |                                   |        |       |       |        |       |        |       |       |
| PFM163                                  | <i>mutD5</i>                      | 3,733  | 862   | 914   | 3,681  | 1,240 | 2,441  | 1,307 | 1,134 |
| PFM165                                  | <i>mutD5 mutL</i>                 | 8,299  | 271   | 1,088 | 7,482  | 2,717 | 4,765  | 2,948 | 1,817 |

\*Data for WT and MMR are from Foster *et al.*, accompanying paper

# Two separate transductions of the *mutL*<sup>Sc</sup> allele into the *mutD5* mutant strain, PFM163; PFM397 and PFM399 are two isolates from the same transduction.

<sup>†</sup>Two isolates from the same transduction

**Supplemental Table S4. The numbers of indels accumulated in the MA experiments**

| Type of indel | <u>Numbers of Indels</u>           |                   |                   |                         |                    |                                         |                   |  |
|---------------|------------------------------------|-------------------|-------------------|-------------------------|--------------------|-----------------------------------------|-------------------|--|
|               | <u>MA experiments on LB medium</u> |                   |                   |                         |                    | <u>MA experiments on minimal medium</u> |                   |  |
|               | <i>mutD5</i>                       | <i>mutD5 mutL</i> | <i>mutD5 dinB</i> | <i>mutD5 dinB umuDC</i> | <i>mutD5 lexA3</i> | <i>mutD5</i>                            | <i>mutD5 mutL</i> |  |
| Total         | 1018                               | 3184              | 851               | 921                     | 1275               | 208                                     | 504               |  |
| +1 bp         | 459                                | 1613              | 465               | 488                     | 632                | 128                                     | 267               |  |
| -1 bp         | 556                                | 1556              | 385               | 429                     | 638                | 79                                      | 232               |  |
| + > 1 bp      | 2                                  | 14                | 1                 | 3                       | 3                  | 0                                       | 3                 |  |
| - > 1 bp      | 1                                  | 1                 | 0                 | 1                       | 2                  | 1                                       | 2                 |  |
| +1 A:T        | 242                                | 1097              | 266               | 287                     | 389                | 108                                     | 174               |  |
| +1 G:C        | 217                                | 516               | 221               | 201                     | 243                | 20                                      | 93                |  |
| -1 A:T        | 318                                | 644               | 199               | 241                     | 315                | 51                                      | 124               |  |
| -1 G:C        | 238                                | 912               | 164               | 188                     | 323                | 28                                      | 108               |  |
| In run        | 965                                | 3100              | 691               | 861                     | 1218               | 198                                     | 489               |  |
| Not in run    | 53                                 | 84                | 160               | 60                      | 57                 | 10                                      | 15                |  |
| Noncoding     | 275                                | 895               | 250               | 238                     | 355                | 80                                      | 168               |  |
| Coding        | 743                                | 2289              | 601               | 683                     | 920                | 128                                     | 336               |  |

bp, base pair; a run is more than two of the same base pair or sequence.
